# Supplementary material for: The trust and insurance models of healthcare purchasing in the Ayushman Bharat Pradhan Mantri Jan Arogya Yojana in India: early findings from case studies of two states
Source: Springer Nature journal article supplement (doi:10.1186/s12913-022-08407-2), 2022-08-18
Supplement: MOESM1 [file 23378710]

**Supplementary Table 1. List of documents reviewed**

| National documents                                                                                                                                                                                                                                                                                                                                                                                                                                                                                                                                                                                                                                                                                          | State documents                                                                                                                                                                                                                                                                                                                                                                                                                                                                                                                                      |                                                                                                                     |
|-------------------------------------------------------------------------------------------------------------------------------------------------------------------------------------------------------------------------------------------------------------------------------------------------------------------------------------------------------------------------------------------------------------------------------------------------------------------------------------------------------------------------------------------------------------------------------------------------------------------------------------------------------------------------------------------------------------|------------------------------------------------------------------------------------------------------------------------------------------------------------------------------------------------------------------------------------------------------------------------------------------------------------------------------------------------------------------------------------------------------------------------------------------------------------------------------------------------------------------------------------------------------|---------------------------------------------------------------------------------------------------------------------|
|                                                                                                                                                                                                                                                                                                                                                                                                                                                                                                                                                                                                                                                                                                             | Uttar Pradesh                                                                                                                                                                                                                                                                                                                                                                                                                                                                                                                                        | Jharkhand                                                                                                           |
| <p>Formation of State Health Agency and District Implementation Unit under Ayushman Bharat-National Health Protection Mission</p> <p>Draft Document on Structure and Tasks of State Health Agency for Implementing Pradhan Mantri Rashtriya Swashtya Suraksha Mission<sup>a</sup> in Trust Mode</p> <p>Guidelines for hospital empanelment</p> <p>Empanelment and packages</p> <p>PMJAY Process flow at empanelled hospitals</p> <p>Guidelines for claim settlement</p> <p>Anti-fraud guidelines</p> <p>Model Agreement Assurance Model with Empanelled Health Care Provider (EHCP)</p> <p>Model Tender Agreement for Implementation Support Agency</p> <p>Model Tender Agreement for Insurance Company</p> | <p>All government orders related to scheme operations issued in the public domain<br/>These were related to:</p> <p>Pilot run of scheme; SHA and Governing Council formation; Formation of various State and District Committees; scheme details including benefits, number of beneficiaries, terminology; Hospital empanelment; District manpower commissioning; general orders related to training, budget allocations</p> <p>Claim processing guidelines</p> <p>Tender document between State Health Agency and Implementation Support Agency</p> | <p>Contract document between State Health Agency and Insurance Company</p> <p>Governing Council Meeting Minutes</p> |

<sup>a</sup> Early nomenclature used for PMJAY

**Supplementary Table 2. List of respondents interviewed**

| <b>Stakeholder group</b>                                     | <b>Jharkhand</b>                              | <b>Uttar Pradesh</b>                          |
|--------------------------------------------------------------|-----------------------------------------------|-----------------------------------------------|
| <b>State health agency</b>                                   | 1 Governing council member                    | 1 Governing council member                    |
|                                                              | 1 Deputy director                             | 1 State nodal officer                         |
|                                                              | Medical officer in-charge                     | 2 Joint directors                             |
|                                                              | Finance manager                               | 1 member of the medical audit team            |
|                                                              | Grievance co-ordinator                        | 1 member of the finance team                  |
|                                                              |                                               | 2 members of the policy team                  |
|                                                              |                                               | Grievance redressal manager                   |
|                                                              |                                               | 1 Project manager                             |
|                                                              |                                               | 1 member of the data analytics team           |
| <b>Insurance Company</b>                                     | Project manager                               |                                               |
| <b>Third-party agencies/ implementation support agencies</b> | 3 Project heads                               | 4 State coordinators                          |
|                                                              | 2 Claim processing doctors                    | 2 Claim processing doctors                    |
|                                                              | 1 Beneficiary identification system executive | 1 Beneficiary identification system executive |
|                                                              | Zonal coordinator                             | Project manager                               |
|                                                              | District TPA manager                          |                                               |
|                                                              |                                               |                                               |
| <b>District Implementation Unit</b>                          | 2 Civil Surgeons                              | 3 Chief Medical Officers                      |
|                                                              |                                               | 2 Additional Chief Medical Officer            |
|                                                              |                                               | 5 members of DIU team                         |
| <b>Empanelled hospitals</b>                                  | 9 Ayushman mitras                             | 7 Ayushman mitras                             |
|                                                              | 7 Administrators                              | 9 Administrators                              |
|                                                              | 2 Health care providers                       | 3 Health care providers                       |

TPA- third-party agency, DIU- district implementation unit

**Supplementary Table 3. Break-up of annual estimated administrative costs for Uttar Pradesh in the first year of the scheme from September 2018**

| <b>Cost head</b>                                            | <b>State level</b>                        | <b>District level</b>                     | <b>Total</b>                          |
|-------------------------------------------------------------|-------------------------------------------|-------------------------------------------|---------------------------------------|
| Human resources recruited for PMJAY <sup>a</sup>            | 30,460,000 INR<br>(421,300 USD)           | 144,000,000 INR<br>(1,991,701 USD)        | 174,460,000 INR<br>(2,413,001 USD)    |
| Contracting of implementation support agencies <sup>b</sup> | 41,544,095 INR<br>(574,607 USD)           | -                                         | 41,544,095 INR<br>(574,607 USD)       |
| Transportation costs <sup>c</sup>                           | 6,000,000 INR<br>(82,988 USD)             | 27,000,000 INR<br>(373,444 USD)           | 33,000,000 INR<br>(456,432 USD)       |
| Materials costs <sup>c</sup>                                | 11,000,000 INR<br>(152,144 USD)           | 16,200,000 INR<br>(224,066 USD)           | 27,200,000 INR<br>(376,210 USD)       |
| Miscellaneous <sup>c</sup>                                  | 60,000,000 INR<br>(829,876 USD)           | 10,800,000 INR<br>(149,378 USD)           | 70,800,000 INR<br>(979,253 USD)       |
| <b>Total</b>                                                | <b>149,004,095 INR</b><br>(2,060,914 USD) | <b>198,000,000 INR</b><br>(2,738,589 USD) | <b>347,004,095 INR</b><br>(4,799,503) |

<sup>a</sup> Based on the sanctioned positions and planned remuneration.

<sup>b</sup> Based on actual contract value, cumulative figure provided for state and districts

<sup>c</sup> Estimates provided by state government officials

Source – Data obtained from the State Health Agency of Uttar Pradesh
